# Supplementary material for: Adrb2 controls glucose homeostasis by developmental regulation of pancreatic islet vasculature
Source: eLife. 2018 Oct 10;7:e39689. doi: 10.7554/eLife.39689 (PMC6200393; doi:10.7554/eLife.39689)
Supplement: Figure 1—figure supplement 1—source data 1. [file elife-39689-fig1-figsupp1-data1.xlsx]

## Sheet: Fig1-FS1A,B
Figure 1-figure supplement 1A,B source data
A	qPCR for adrenergic receptors in P6 Adrb2 cKO pancreas
	Adra1a	Adra1b	Adra1d	Adra2a	Adra2b	Adra2c	Adrb1	Adrb2	Adrb3
	1.37019	0.132582	0.10505	3.11269	0.560131	1.56377	0.88429	0.261934	2.6641
	1.32213	2.22119	0.967785	0.94863	0.214108	0.234382	1.76832	0.480459	1.49561
	0.449187	0.447741	0.741627	0.468991	0.782656	1.40684	0.166479	0.311702	1.4549
	1.13128	2.8262	4.12591	1.23812	1.61151	0.595349	0.710769	0.48205	0.100613
	0.545399	1.28971	0.724206	1.11435	1.05847	1.05445	0.982843	0.512902	0.236096
	0.843177	0.476958	0.823161	1.63941	1.84817	1.94909	1.62665	0.200134	0.783533
	2.20595		1.4213	0.744501	1.06653	0.717346	0.930612	0.310952
								0.252374
	controls normalized to 1 for each gene
B		qPCR for Adrb2 in adult male and female control and Adrb2 cKO islets
		Female Control	Female cKO	Male cKO
		1.88146	0.0515077	0.0411464
		1.30066	0.0645084	0.18541
		1.43812	0.0562445	0.121433
		1.48428	0.202758
		2.57999	0.289648
	male control set to 1

## Sheet: Fig1-FS1C
Figure 1-figure supplement 1C source data
	Insulin tolerance in male control and Adrb2 cKO 2-month-old mice
timepoint (min)	male controls
0	100	100	100
15	60	70.6294	57.0423
30	73.8461	69.2308	60.5634
45	80.7692	74.1259	66.1972
60	101.538	86.014	75.3521
timepoint (min)	male Adrb2 cKO
0	100	100	100	100	100	100
15	42.7673	74.8466	64.6018	113.178	64.0625	47.2727
30	52.2013	50.3067	84.9557	100	66.4062	56.3636
45	62.8931	52.1472	102.655	102.326	73.4375	63.0303
60	75.4717	65.0307	141.593	99.2248	90.625	80

## Sheet: Fig1-FS1D
Figure 1-figure supplement 1D source data
	Insulin tolerance in female control and Adrb2 cKO 2-month-old mice
timepoint (min)	female controls
0	100	100	100
15	54.1667	42.5197	49.6
30	40.8333	49.6063	56
45	40.8333	48.8189	60.8
60	48.3333	61.4173	49.6
timepoint (min)	female Adrb2 cKO
0	100	100	100	100	100
15	54.2857	61.4173	39.3548	49.6183	61.9048
30	55.7143	40.9449	71.6129	58.7786	68.5714
45	53.5714	49.6063	61.2903	51.9084	64.7619
60	69.2857	68.5039	62.5806	94.6565	54.2857

## Sheet: Fig1-FS1F
Figure 1-figure supplement 1F source data
	Islet insulin content (ng/ng DNA) in 2-month-old female control and Adrb2 cKO islets
		Female Control	Female Adrb2 cKO
		296.797	470.52
		325.209	976.81
		326.456	1318.89
		362.507	953.49
		518.136	1217.51
			628.39
			1419.25

## Sheet: Fig1-FS1G,H,J
Figure 1-figure supplement 1G,H,J source data
G	Endocrine cell counts from adult female control and Adrb2 cKO pancreas
			control female
		-cells	616.75	101.75	105.5	185.5
		-cells	1301	491.75	795.5	511.5
			Adrb2 cKO female
		-cells	302.25	140	269.5	396.75
		-cells	824	411.75	1119.25	1164
H	Percent of islets by area
		Area	control female
		0-1	9.09091	15.3846	19.0476
		1-5	46.5909	59.6154	59.5238
		5+	44.3182	25	21.4286
		Area	Adrb2 cKO female
		0-1	26.4706	36.1702	27.0588	33.3333
		1-5	51.4706	51.0638	47.0588	30.1587
		5+	22.0588	12.766	25.8823	36.5079
J	EdU+/Insulin+ cells
		Control	Adrb2 cKO
		0.559227	0.607165
		1.13136	0.580746
		0.488759	1.39605
	Mean ± SEM	0.7265 ± 0.2035	0.8613 ± 0.2675

## Sheet: Fig1-FS1K
Figure 1-figure supplement 1K source data
	qPCR for Adrb2 levels in P6 beta-cells and non-beta-bells
	-cell	non--cell
	1	0.433993
	1	0.433063
	1	0.029545
	1	0.11831
	-cell values normalized to 1

## Sheet: Fig1-FS1L,M
Figure 1-figure supplement 1L,M source data
K	Glucose tolerance in female control and Adrb2 i-cKO 2-month-old mice								L
timepoint (min)	Adrb2 i-cKO + Vehicle								AUC Mean ± SEM
0	84	105	102	84	98				20.39 ± 3.197
30	268	399	415	284	273
60	254	429	549	386	295
90	275	424	600	513	245
timepoint (min)	Adrb2 i-cKO + TMX								AUC Mean ± SEM
0	103	88	101	95	73	59	63		18.97 ± 1.829
30	294	349	308	403	217	183	266
60	266	431	337	402	374	327	417
90	295	541	248	395	320	261	555

## Sheet: Fig1-FS1N
Figure 1-figure supplement 1N source data
	In vivo insulin secretion in female control and Adrb2 i-cKO 2-month-old mice
	timepoint (min)	Adrb2 i-cKO + Vehicle
	0	0.224153	0.082019	0.214511	0.155695	0.19279	0.205852
	5	0.297683	0.321767	0.22082	0.38349	0.41954	0.577325
	10	0.454545	0.194322	0.203155	0.363636	0.465517	0.625392
	15	0.602496	0.192429	0.227129	0.303553	0.517764	0.533438
	30	0.327094	0.183596	0.246688	0.370428	0.463427	0.447231
	60	0.295009	0.246688	0.244164	0.31348	0.474399	0.401776
	timepoint (min)	Adrb2 i-cKO + TMX
	0	0.137539	0.139432	0.105363	0.323929	0.363114
	5	0.275079	0.325552	0.198107	0.594566	0.384535
	10	0.27571	0.410726	0.224606	0.624347	0.328631
	15	0.298423	0.42082	0.316088	0.541797	0.473877
	30	0.294006	0.299054	0.272555	0.588819	0.323406
	60	0.300315	0.229022	0.381703	0.482236	0.326019

## Sheet: Fig1-FS1O
Figure 1-figure supplement 1O source data
	In vitro insulin secretion in female control and Adrb2 i-cKO 2-month-old islets
		female controls
	2.8mM glucose	0.82596	0.150606	0.200877
	16.7 mM glucose	1.46444	1.2208	1.92445
		female Adrb2 i-cKO mice
	2.8mM glucose	0.647124	0.311463	0.518323
	16.7 mM glucose	2.38427	1.52645	1.68149
