# Supplementary material for: Adrb2 controls glucose homeostasis by developmental regulation of pancreatic islet vasculature
Source: eLife. 2018 Oct 10;7:e39689. doi: 10.7554/eLife.39689 (PMC6200393; doi:10.7554/eLife.39689)
Supplement: Figure 1—source data 1. [file elife-39689-fig1-data1.xlsx]

## Sheet: Fig1A,B
Figure 1A,B source data
A	Glucose tolerance in female control and Adrb2 cKO 2-month-old mice								B
timepoint (min)	female controls								AUC Mean ± SEM
0	80	61	66	59	71	43			20 ± 2.052
30	335	285	400	295	178	370
60	330	358	439	285	283	316
90	328	383	482	322	267	370
timepoint (min)	female Adrb2 cKO mice								AUC Mean ± SEM
0	93	89	64	97	69	120	80		29.81 ± 2.615
30	355	371	388	529	600	283	376
60	446	538	526	600	600	432	516
90	500	524	600	600	600	425	600

## Sheet: Fig1C,D
Figure 1C,D source data
C	Glucose tolerance in male control and Adrb2 cKO 2-month-old mice										D
timepoint (min)	male controls										AUC Mean ± SEM
0	70	56	78	85	60	82					31.24 ± 2.209
30	527	413	470	420	371	323
60	600	589	600	502	427	445
90	600	600	600	522	466	487
timepoint (min)	male Adrb2 cKO mice										AUC Mean ± SEM
0	50	76	124	65	78	74	72	116	63		30.59 ± 1.668
30	367	527	568	374	449	264	468	425	457
60	517	600	600	403	483	467	600	440	517
90	513	600	600	370	500	509	600	600	600

## Sheet: Fig1E
Figure 1E source data
	In vivo Insulin secretion in female control and Adrb2 cKO 2-month-old mice
	timepoint (min)	female controls
	0	0.252698	0.359223	0.852396	1.16306	0.319789	0.253826
	5	0.422857	0.473173	1.23957	1.00541	0.469129	0.516623
	10	0.425397	0.543178	1.27048	1.1422	0.498681	0.597889
	15	0.488254	0.433827	1.42581	1.25348	0.486016	0.575198
	30	0.59619	0.303015	0.940495	0.964451	0.473879	0.356201
	60	0.604444	0.264691	0.471406	0.612056	0.42058	0.307124
	timepoint (min)	female Adrb2 cKO mice
	0	1.07866	0.233795	0.250159	0.210794	0.209524	0.179356	0.205927	0.227389
	5	0.310269	0.344501	0.428571	0.370794	0.254603	0.363311	0.314768	0.391926
	10	0.469046	0.403496	0.342857	0.400635	0.31746	0.491058	0.341339	0.419009
	15	0.520029	0.423161	0.340317	0.428571	0.340317	0.416454	0.331119	0.415943
	30	0.403496	0.401311	0.40381	0.361905	0.263492	0.430761	0.299438	0.397547
	60	0.441369	0.453023	0.337143	0.370794	0.28	0.400613	0.278487	0.403168

## Sheet: Fig1F
Figure 1F source data
	In vivo Insulin secretion in male control and Adrb2 cKO 2-month-old mice
	timepoint (min)	male controls
	0	0.070042	0.061603	0.17263	0.201748	0.233651
	5	0.144304	0.329114	0.254865	0.407866	0.329524
	10	0.216034	0.351055	0.263653	0.369264	0.376508
	15	0.188186	0.357806	0.277464	0.404224	0.420317
	30	0.235443	0.305485	0.283741	0.387473	0.369524
	60	0.27173	0.390717	0.418079	0.393299	0.360635
	timepoint (min)	male Adrb2 cKO mice
	0	0.108017	0.080169	0.220829	0.177652	0.24381	0.205714
	5	0.170464	0.297046	0.307618	0.222222	0.307937	0.257778
	10	0.165401	0.438819	0.42623	0.24231	0.328889	0.285079
	15	0.313924	0.556962	0.481678	0.290019	0.384762	0.280635
	30	0.414346	0.385654	0.428158	0.259887	0.372063	0.283175
	60	0.336709	0.383122	0.458534	0.441306	0.409524	0.351746

## Sheet: Fig1G
Figure 1G source data
	In vitro Insulin secretion in female control and Adrb2 cKO 2-month-old islets
		female controls
	2.8mM glucose	3.32239	6.8155	1.40981	3.39181
	16.7 mM glucose	12.7008	12.9802	13.3933	12.1753
		female Adrb2 cKO mice
	2.8mM glucose	0.0985835	0.001604	0.305349	0.037161	0.744249	0.302343	2.24065
	16.7 mM glucose	0.570738	0.00326	0.171783	0.06853	0.307611	0.190898	2.12027

## Sheet: Fig1H
Figure 1H source data
	qPCR for islet Adrb2 levels in males and females
			female islets
		P2	11.973	7.78357	1.4176
		P6	1.80629	1.31763	1.34106
		P60	0.418781	0.300411	0.334929
			male islets
		P2	1.80313	4.76369	0.470361	1.62476	1.91837
		P6	1	1.03683	1	1
		P60	0.157649	0.134188	0.181549

## Sheet: Fig1I,J
Figure 1I,J source data
I	Glucose tolerance in female control and Adrb2 i-cKO 2-month-old mice								J
timepoint (min)	Adrb2 i-cKO + Vehicle								AUC Mean ± SEM
0	53	44	57	65	70	95	81		18.01 ± 0.9455
30	172	237	259	284	259	270	299
60	331	269	402	269	313	376	289
90	502	428	506	273	353	315	294
timepoint (min)	Adrb2 i-cKO + TMX								AUC Mean ± SEM
0	83	85	73	95	89				30.83 ± 3.683
30	367	537	255	451	426
60	421	600	456	600	473
90	422	600	497	600	541

## Sheet: Fig1K
Figure 1K source data
	In vivo Insulin secretion in female control and Adrb2 i-cKO 2-month-old mice
	timepoint (min)	Adrb2 i-cKO + Vehicle
	0	0.246445	0.21564	0.500592
	5	0.268957	0.384479	0.345379	0.404621
	10	0.383294	0.459123	0.418246	0.825237
	15	0.30154	0.489336	0.415284	0.439573
	30		0.38981	0.396327	0.391588
	60		0.35782	0.555687	0.376185
	timepoint (min)	Adrb2 i-cKO + TMX
	0	0.195498	0.184834	0.099382	0.147108
	5	0.288507	0.212678	0.12128	0.186974
	10	0.293246	0.239336	0.164514	0.206064
	15	0.294431	0.23282	0.184166	0.240314
	30	0.297986	0.222156	0.202134	0.183043
	60	0.390403	0.261256	0.181359	0.190343
