# Supplementary material for: Adrb2 controls glucose homeostasis by developmental regulation of pancreatic islet vasculature
Source: eLife. 2018 Oct 10;7:e39689. doi: 10.7554/eLife.39689 (PMC6200393; doi:10.7554/eLife.39689)
Supplement: Figure 2—figure supplement 1—source data 1. [file elife-39689-fig2-figsupp1-data1.xlsx]

## Sheet: Fig2-FS1A,B,D
Figure 2-figure supplement 1A,B,D source data
A	Endocrine cell counts from P6 control and Adrb2 cKO pancreas
			control
		-cells	144.4	191.167	604.5	75.4615	207.714	233.25
		-cells	485.8	608.833	1486.5	216	429	570.125
			Adrb2 cKO
		-cells	63.1667	195.25	263.6	284.25
		-cells	287.667	675.5	994.6	589.5
B	Percent of islets by area
		Area	control
		0-1	45	39.8438	41.9355	40.9836	32.4675	40.7692
		1-5	34	38.2812	33.3333	36.0656	38.961	41.5385
		5+	21	21.875	24.7312	22.9508	28.5714	17.6923
		Area	Adrb2 cKO
		0-1	57.7778	52.9851	56.2841	57.5
		1-5	35.5556	32.8358	24.5902	25
		5+	6.66667	14.1791	19.1257	17.5
D	EdU+/Insulin+ cells
		Control	Adrb2 cKO
		2.37812	3.21188
		2.71289	4.82187
		4.42943	5.4584
	Mean ± SEM	3.173 ± 0.6354	4.497 ± 0.6685

## Sheet: Fig2-FS1E
Figure 2-figure supplement 1A,B,D source data
	P6 islet insulin content (ng/ng DNA)
	Control	Adrb2 cKO
	224.627	196.174
	160.81	608.045
	153.731	380.399
		366.61
		507.123

## Sheet: Fig2-FS1F
Figure 2-figure supplement 1F source data
	qPCR for Ins2 from MIN6 cells
	Treatment
	Salbutamol	1.98644	1.42251	0.407628	1.16282
	Epinephrine	0.451375	0.505875	1.01025
	Norepinephrine	1.0148	1.69431	0.99406
	compared to untreated values normalized to 1

## Sheet: Fig2-FS1I
Figure 2-figure supplement 1I source data
	TH Integrated Density (normalized by area)
	Control	Adrb2 cKO
	11.8482	13.7502
	14.825	11.432
	10.2462	12.36
		16.4435
		22.5929

## Sheet: Fig2-FS1J
Figure 2-figure supplement 1F source data
	qPCR for Vegfa from MIN6 cells
	Treatment
	Salbutamol	0.27581	0.345986	0.370665
	Epinephrine	0.264789	0.345666	0.695059	0.627743
	Norepinephrine	1.01677	1.46577	0.652451
	compared to untreated values normalized to 1

## Sheet: Fig2-FS1K
Figure 2-figure supplement 1K source data
	qPCR for Vegfa from male and female P6 pancreas
	Female Control	Male Control	Male Adrb2 cKO
	0.869844	2.11354	1.32495
	0.639421	2.1673	7.16723
	0.842946	4.72389	2.09965
	2.13291	2.6247	1.48721
		1.42962

## Sheet: Fig2-FS1M
Figure 2-figure supplement 1M source data
	Vessel length/islet area in males
	Male Control	Male Adrb2 cKO
	165.483	141.487
	164.185	116.281
	164.481	160.731
	*see female control values in Fig2F
