# Supplementary material for: Adrb2 controls glucose homeostasis by developmental regulation of pancreatic islet vasculature
Source: eLife. 2018 Oct 10;7:e39689. doi: 10.7554/eLife.39689 (PMC6200393; doi:10.7554/eLife.39689)
Supplement: Figure 2—source data 1. [file elife-39689-fig2-data1.xlsx]

## Sheet: Fig2 B,D
Figure 2B,D source data
B	qPCR for Ins2 levels in female Adrb2 cKO mice
	P0	P2	P6
	0.259955	4.08146	7.54329
	2.20216	1.64311	19.9768
	0.589959	5.55924	12.8746
	0.913181	3.702	0.216032
	2.04742	1.66242	1.90424
	0.345897	0.468894	4.37067
		2.83074	0.414002
			2.09905
			2.47057
			5.69139
	age-matched control values normalized to 1
D	Cytoplasmic insulin granule density
	Control	Adrb2 cKO
	31.8532	49.1328
	24.2547	47.8783
	38.5983	53.1977

## Sheet: Fig2F
Figure 2F source data
	Vessel length/islet area
	Control	Adrb2 cKO
	111.967	183.537
	126.297	199.156
	137.214	198.303

## Sheet: Fig2H,I
Figure 2H,I source data
H	Fenestrae number per micron of plasma membrane
	Control	Adrb2 cKO
	0.71645	0.140568
	0.716222	0.142707
	0.748786	0.327222
I	Caveolae number per micron of plasma membrane
	Control	Adrb2 cKO
	0.25	1.81685
	0.331181	2.95284
	0.420964	2.4545

## Sheet: Fig2J
Figure 2J source data
B	qPCR for Vegfa levels in female Adrb2 cKO mice
	P0	P2	P6
	0.370891	4.45695	3.55672
	1.36136	6.17553	2.64317
	0.35865	3.87289	2.4367
		4.41217	4.72902
			4.8845
	age-matched control values normalized to 1

## Sheet: Fig2K,L
Figure 2K,L source data
K	qPCR for Vegfa levels in female control and Adrb2 cKO beta-cells
	Control	Adrb2 cKO
	2.822	11.2238
	0.017722	14.855
	1.9408	2.84382
	1.47656	22.266
	1.17446	4.80153
		1.36659
		1.95199
L	qPCR for Vegfa levels in female control and Adrb2 cKO non-beta-cells
	Control	Adrb2 cKO
	0.882779	1.58611
	0.737661	1.84398
	0.912883	0.774029
	2.09253	1.06051
	0.803905	0.941289
