# Supplementary material for: Adrb2 controls glucose homeostasis by developmental regulation of pancreatic islet vasculature
Source: eLife. 2018 Oct 10;7:e39689. doi: 10.7554/eLife.39689 (PMC6200393; doi:10.7554/eLife.39689)
Supplement: Figure 3—source data 1. [file elife-39689-fig3-data1.xlsx]

## Sheet: Fig3A
Figure 3A source data
	KCl-induced insulin secretion from control and Adrb2 cKO 2-month-old islets
		Control
	2.8mM glucose	3.32239	6.8155	1.40981	3.39181
	30mM KCl	11.5283	10.7523	15.153	10.4511
		Adrb2 cKO
	2.8mM glucose	0.001604	0.305349	0.037161	0.302343	2.24065
	30mM KCl	0.003027	0.313524	0.067693	0.360774	2.17252

## Sheet: Fig3C
Figure 3A source data
	Insulin granule docking in control and Adrb2 cKO mice
		Female Control
	Fasted	0.646841	0.54362	0.691869
	Glucose	1.2381	1.35674	1.49878
		Female Adrb2 cKO
	Fasted	0.271128	0.651129	0.54646
	Glucose	0.586091	0.670893	0.85864

## Sheet: Fig3E
Figure 3E source data
	Calcium Imaging fluorescence intensities
		Area under the curve-high glucose				Area under the curve-KCl
		Control	Adrb2 cKO			Control	Adrb2 cKO
		20.42	-38.08			15.5	-280.4
		79.72	-50.12			94.01	-53.05
		141.9	-133.8			237.5	-318.1
		Data shown: average from 10 cells per animal
		Time (s)	Control				Adrb2 cKO
		0	1.02445	0.994737	0.942039	0.917222	1.00648	1.01704	1.05241
		15	1.02057	0.997369	0.952596	0.929699	1.0095	1.01522	1.04885
		30	1.01962	0.994788	0.959654	0.943044	1.00444	1.01412	1.04241
		45	1.01631	0.997313	0.967595	0.958	1.00691	1.00983	1.03443
		60	1.0139	0.994548	0.972177	0.972604	1.00675	1.00907	1.02668
		75	1.0118	0.996505	0.977577	0.984181	1.00296	1.00806	1.02261
		90	1.01178	0.994996	0.984377	0.99352	1.00316	1.00333	1.01436
		105	1.01098	0.998939	0.990073	1.00336	1.00244	1.00263	1.00611
		120	1.00676	0.996646	0.996799	1.01416	1.00142	0.999349	0.996299
		135	1.00273	0.998213	1.00248	1.02404	0.999846	0.996009	0.989417
		150	1.00196	1.00007	1.00711	1.0329	1.0002	0.994608	0.979152
		165	0.995052	1.00221	1.01273	1.04176	0.998876	0.990333	0.973416
		180	0.991528	1.00005	1.01943	1.04923	0.996182	0.988221	0.964206
		195	0.984348	1.00448	1.02717	1.05451	0.996148	0.986689	0.954186
		210	0.980885	1.00424	1.0325	1.06287	0.995349	0.983515	0.943238
		225	0.977105	1.00385	1.03674	1.06497	0.992796	0.980366	0.93472
		240	0.973356	1.01037	1.03916	1.07221	0.991827	0.978852	0.929635
		255	0.970376	1.00761	1.03916	1.07834	0.991187	0.976988	0.920561
		270	0.96296	1.00702	1.04062	1.08437	0.991252	0.976216	0.907366
	glucose added	285	0.963138	1.08586		0.818272	0.91445		0.9395
		300	0.959111	1.07649		1.22374	0.979445	0.921424	0.921066
		315	0.954412	1.22241		1.22454	0.970886	0.926568	0.912997
		330	0.851368	1.33263		1.23379	0.967463	0.927765	0.894559
		345	1.39804	1.36916		1.2364	0.967271	0.931439	0.882904
		360	1.32622	1.38049		1.24113	0.965108	0.932163	0.872706
		375	1.22288	1.38157		1.2449	0.962789	0.934048	0.862654
		390	1.17101	1.36181		1.24719	0.961356	0.936268	0.852945
		405	1.11962	1.34202		1.25539	0.959905	0.934645	0.846149
		420	1.07097	1.31152		1.26222	0.95765	0.936649	0.837184
		435	1.0488	1.29387		1.26214	0.951544	0.935005	0.827136
		450	1.03555	1.26051		1.26313	0.948957	0.933899	0.819336
		465	1.02243	1.24387		1.26526	0.946991	0.92966	0.811021
		480	1.0004	1.21407		1.2647	0.946132	0.93044	0.804093
		495	0.983236	1.19414		1.26533	0.946051	0.927605	0.797873
		510	0.976419	1.17202		1.2658	0.945629	0.926547	0.792032
		525	0.968649	1.1548		1.26332	0.944001	0.92286	0.78306
		540	0.951886	1.13378		1.2664	0.941584	0.91879	0.776136
		555	0.947577	1.12293		1.26712	0.940004	0.915606	0.76776
		570	0.941584	1.10265		1.26367	0.938374	0.914383	0.761184
		585	0.930091	1.09057		1.26548	0.936736	0.911473	0.752664
		600	0.926356	1.08075		1.26416	0.931569	0.908289	0.745418
		615	0.923861	1.07081		1.26067	0.93056	0.905318	0.738609
		630	0.912022	1.05953		1.26139	0.93013	0.90396	0.733098
		645	0.910343	1.05282		1.26031	0.928259	0.89988	0.725567
		660	0.906319	1.04578		1.25933	0.923664	0.896981	0.718358
		675	0.90107	1.04107		1.25535	0.92085	0.896443	0.712238
		690	0.898633	1.036		1.25649	0.9201	0.894374	0.703427
		705	0.896281	1.032		1.25086	0.917208	0.89048	0.697884
		720	0.893019	1.02248		1.2477	0.916627	0.889845	0.692844
		735	0.889851	1.02001		1.2423	0.914812	0.888609	0.685699
		750	0.885014	1.01654		1.23906	0.911579	0.885824	0.678675
		765	0.882896	1.01238		1.23082	0.910005	0.884662	0.67464
		780	0.87872	1.00974		1.22341	0.908641	0.884193	0.669217
		795	0.874632	1.00686		1.22008	0.906357	0.881247	0.661844
		810	0.871141	1.00321		1.20921	0.902393	0.880396	0.656447
		825	0.870265	0.999328		1.19865	0.902937	0.884941	0.649615
		840	0.865959	1.00158		1.19169	0.900885	0.919445	0.645573
		855	0.863559	0.998381		1.17928	0.899365	0.919012	0.637952
		870	0.863959	0.998752		1.17302	0.900938	0.916916	0.600877
	KCl added	885	1.28517		1.53672	1.46033	0.540167	0.914416	0.576426
		900	1.28661		1.48371	1.45215	0.539382	0.910741	0.567526
		915	1.19551		1.47446	1.46658	0.538936	0.909198	0.562324
		930	1.13552		1.46764	1.47434	0.537862	0.907315	0.554376
		945	1.09665		1.45222	1.48408	0.537416	0.908884	0.547187
		960	1.06459		1.43039	1.49073	0.536507	0.906928	0.54209
		975	1.05509		1.40922	1.49389	0.535745	0.906712	0.535046
		990	1.03537		1.38292	1.49575	0.534192	0.906088	0.525681
		1005	1.01831		1.358	1.49867	0.533622	0.904854	0.519374
		1020	1.00425		1.33014	1.50126	0.532779	0.902877	0.511549
		1035	0.993697		1.30415	1.50664	0.531051	0.902468	0.504782
		1050	0.984001		1.28168	1.50175	0.530901	0.900659	0.497457
		1065	0.978402		1.25537	1.50142	0.529256	0.901679	0.491626
		1080	0.97068		1.23345	1.50144	0.528294	0.89929	0.486564
		1095	0.963337		1.20818	1.49557	0.527289	0.898427	0.479271
		1110	0.958277		1.18624	1.50041	0.527451	0.897273	0.47307
		1125	0.951287		1.16491	1.49462	0.52521	0.894083	0.46659
		1140	0.948557		1.14093	1.49299	0.524369	0.893643	0.461405
		1155	0.941307		1.12289	1.48326	0.523115	0.894344	0.456492
		1170	0.934984		1.10197	1.47737	0.522726	0.892688	0.450378
		1185	0.934453		1.0813	1.46463	0.520686	0.891188	0.446369
		1200	0.927543		1.06106	1.45683	0.520124	0.889734	0.440826
		1215	0.925468		1.04204	1.45165	0.518789	0.88966	0.436411
		1230	0.922028		1.02246	1.43112	0.517399	0.887487	0.430275
		1245	0.918027		1.00589	1.42819	0.515592	0.887898	0.424709
		1260	0.913558		0.987877	1.42268	0.515172	0.885367	0.420365
		1275	0.90924		0.970303	1.4231	0.513873	0.883879	0.416482
		1290	0.909214		0.953096	1.42037	0.513245	0.880624	0.41208
		1305	0.912902		0.936117	1.43412	0.511176	0.878219	0.407892
		1320	0.90211		0.921691	1.43256	0.510367	0.875387	0.404486
		1335	0.901639		0.904626	1.4377	0.508265	0.874513	0.400194
		1350	0.897811		0.890343	1.44536	0.507517	0.872253	0.394616
		1365	0.895046		0.87576	1.45592	0.505632	0.870561	0.390914
		1380	0.888964		0.859927	1.23492	0.505681	0.801849	0.387222

## Sheet: Fig3F
Figure 3F source data
	qPCR from adult islets
	Aldob	Pfkl	Ldha	Tpi	Pklr	Kcnj11	Abcc8	Cacna1c	Cacna1d	Snap25	Stx1a	Pclo	Rph3al	Neurod1	Nkx6.1	Npy	Pdx1	Ucn3	Slc2a2
	2.76924	1.91713	0.78369	1.07775	2.87163	0.701541	0.870806	0.259635	1.121	0.825598	1.32869	0.400238	0.506218	0.191647	0.257903	8.2091	0.866109	1.78563	0.516151
	2.11956	2.05016	1.66813	1.67687	0.066848	0.015229	1.11458	0.010647	0.948474	0.021331	0.081507	0.033752	0.044218	0.015422	1.13389	0.721249	1.68263	0.759426	0.378693
	0.857504	0.396359	0.026703	0.085904	0.518184	1.42271	1.14285	0.669672	1.18	0.252315	1.38126	0.735456	0.402712	0.664651	2.57264	5.11209	0.605738	0.574794	0.126905
	0.623024	0.62435	2.90746	3.24638			1.66278	0.182342		0.58343	4.06462	0.415406	0.580073	0.333296	0.515871	4.93718
			0.297574	0.393283								0.761503				4.05191
	normalized to control values of 1 for each gene
