# Supplementary material for: Adrb2 controls glucose homeostasis by developmental regulation of pancreatic islet vasculature
Source: eLife. 2018 Oct 10;7:e39689. doi: 10.7554/eLife.39689 (PMC6200393; doi:10.7554/eLife.39689)
Supplement: Figure 4—figure supplement 1—source data 1. [file elife-39689-fig4-figsupp1-data1.xlsx]

## Sheet: Fig4-FS1A
Figure 4-figure supplement 1A source data
	qPCR for Vegfa from P6 rescue
	control + veh	cKO + veh	cKO + AB
	1.10499	1.6244	1.92324
	0.859252	1.40647	2.60141
	1.05322	2.02214	2.01062
	1
	1.01385
	0.986338
