# Supplementary material for: Adrb2 controls glucose homeostasis by developmental regulation of pancreatic islet vasculature
Source: eLife. 2018 Oct 10;7:e39689. doi: 10.7554/eLife.39689 (PMC6200393; doi:10.7554/eLife.39689)
Supplement: Figure 4—source data 1. [file elife-39689-fig4-data1.xlsx]

## Sheet: Fig4B
Figure 4B source data
	Vessel length/islet area - rescue
	Control + veh.	cKO + veh.	cKO + AB
	96.2157	270.422	152.487
	104.669	172.763	107.947
	100.004	154.125	101.406
			96.7211

## Sheet: Fig4C
Figure 4C source data
	Ins2 levels - recue
	Control +veh.	cKO +veh.	cKO +AB
	0.896543	2.27709	1.08742
	1.6806	1.81603	1.30155
	1.05469	2.00786	0.276249
	0.002834	3.38092	1.61975
	1.88731	3.03627	2.16673
	0.394916	3.0015
	1.33426	1.58047
	2.33819
	1.4387
	1.36199
	1.22343
	1.68419

## Sheet: Fig4D,E
Figure 4D,E source data
D	Glucose tolerance in female control + veh, cKO + veh, and cKO + AB 2-month-old females
													E
	Time (minutes)	Control + veh											AUC Mean ± SEM
	0	70	54	92	91	53	85	55	77	84	86		22.18 ± 1.12
	30	297	340	474	383	374	334	270	390	373	324
	60	310	391	386	412	463	306	347	351	363	374
	90	401	495	403	508	503	312	323	344	317	390
	Time (minutes)	cKO + Vehicle											AUC Mean ± SEM
	0	79	143	60	68	101							30.34 ± 1.499
	30	457	506	442	356	502
	60	417	600	600	477	428
	90	527	600	600	538	533
	Time (minutes)	cKO + AB											AUC Mean ± SEM
	0	136	61	87	74	84	84						20.62 ± 1.225
	30	358	292	385	301	316	424
	60	429	412	367	339	279	371
	90	599	447	372	276	295	344

## Sheet: Fig4F
Figure 4F source data
	Islet insulin secretion in female control + veh, cKO + veh, and cKO + AB 2-month-old females
		control + veh.
	2.8 mM glucose	1.47115	1.13218	1.00072	0.395951
	16.7 mM glucose	2.3228	1.87275	2.4292	3.32468
		cKO + veh.
	2.8 mM glucose	1.46507	0.917862	0.61707
	16.7 mM glucose	0.675411	0.570415	0.867406
		cKO + AB
	2.8 mM glucose	0.258901	1.21694	0.820025	1.09034	0.909655
	16.7 mM glucose	1.435	1.52087	1.79816	2.45623	3.1782

## Sheet: Fig4G
Figure 4F source data
	qPCR from adult control + veh, cKO + veh, and cKO + AB islets
		control + veh
	Cacna1c	1.37804	0.68282	1.06276
	Snap25	1.48612	1.03862	0.647874
	Pclo	1.33263	0.595407	1.26031
	Rph3al	1.26197	0.966878	0.819556
	Neurod1	1.05513	0.814759	1.07404	1.30405	0.830522
	NPY	1.21332	0.824186	0.580164	1.31789	1.08681	1.20342
		cKO + veh
	Cacna1c	0.730092	0.117674	0.027578	0.013701	0.850324	0.498648
	Snap25	0.102696	0.084807	0.014311	0.411979	0.480358
	Pclo	0.580273	0.57054	0.009931	0.131339	0.102255	0.601365
	Rph3al	0.69823	0.48365	0.279882	0.702601
	Neurod1	0.696261	0.289105		0.333286		0.464155
	NPY	1.928	1.9729	1.99963
		cKO + AB
	Cacna1c	0.958849	1.01099	2.18974
	Snap25	1.07891	0.856519	2.37322
	Pclo	0.75414	0.736142	1.80624
	Rph3al	1.46954	1.45251	2.93502
	Neurod1	1.0294	0.97973	2.34312
	NPY	1.43965	0.573224	1.95782
