# Supplementary figures and images for: Adrb2 controls glucose homeostasis by developmental regulation of pancreatic islet vasculature
Source: eLife journal article supplement (doi:10.7554/elife.39689), 2018-10-10

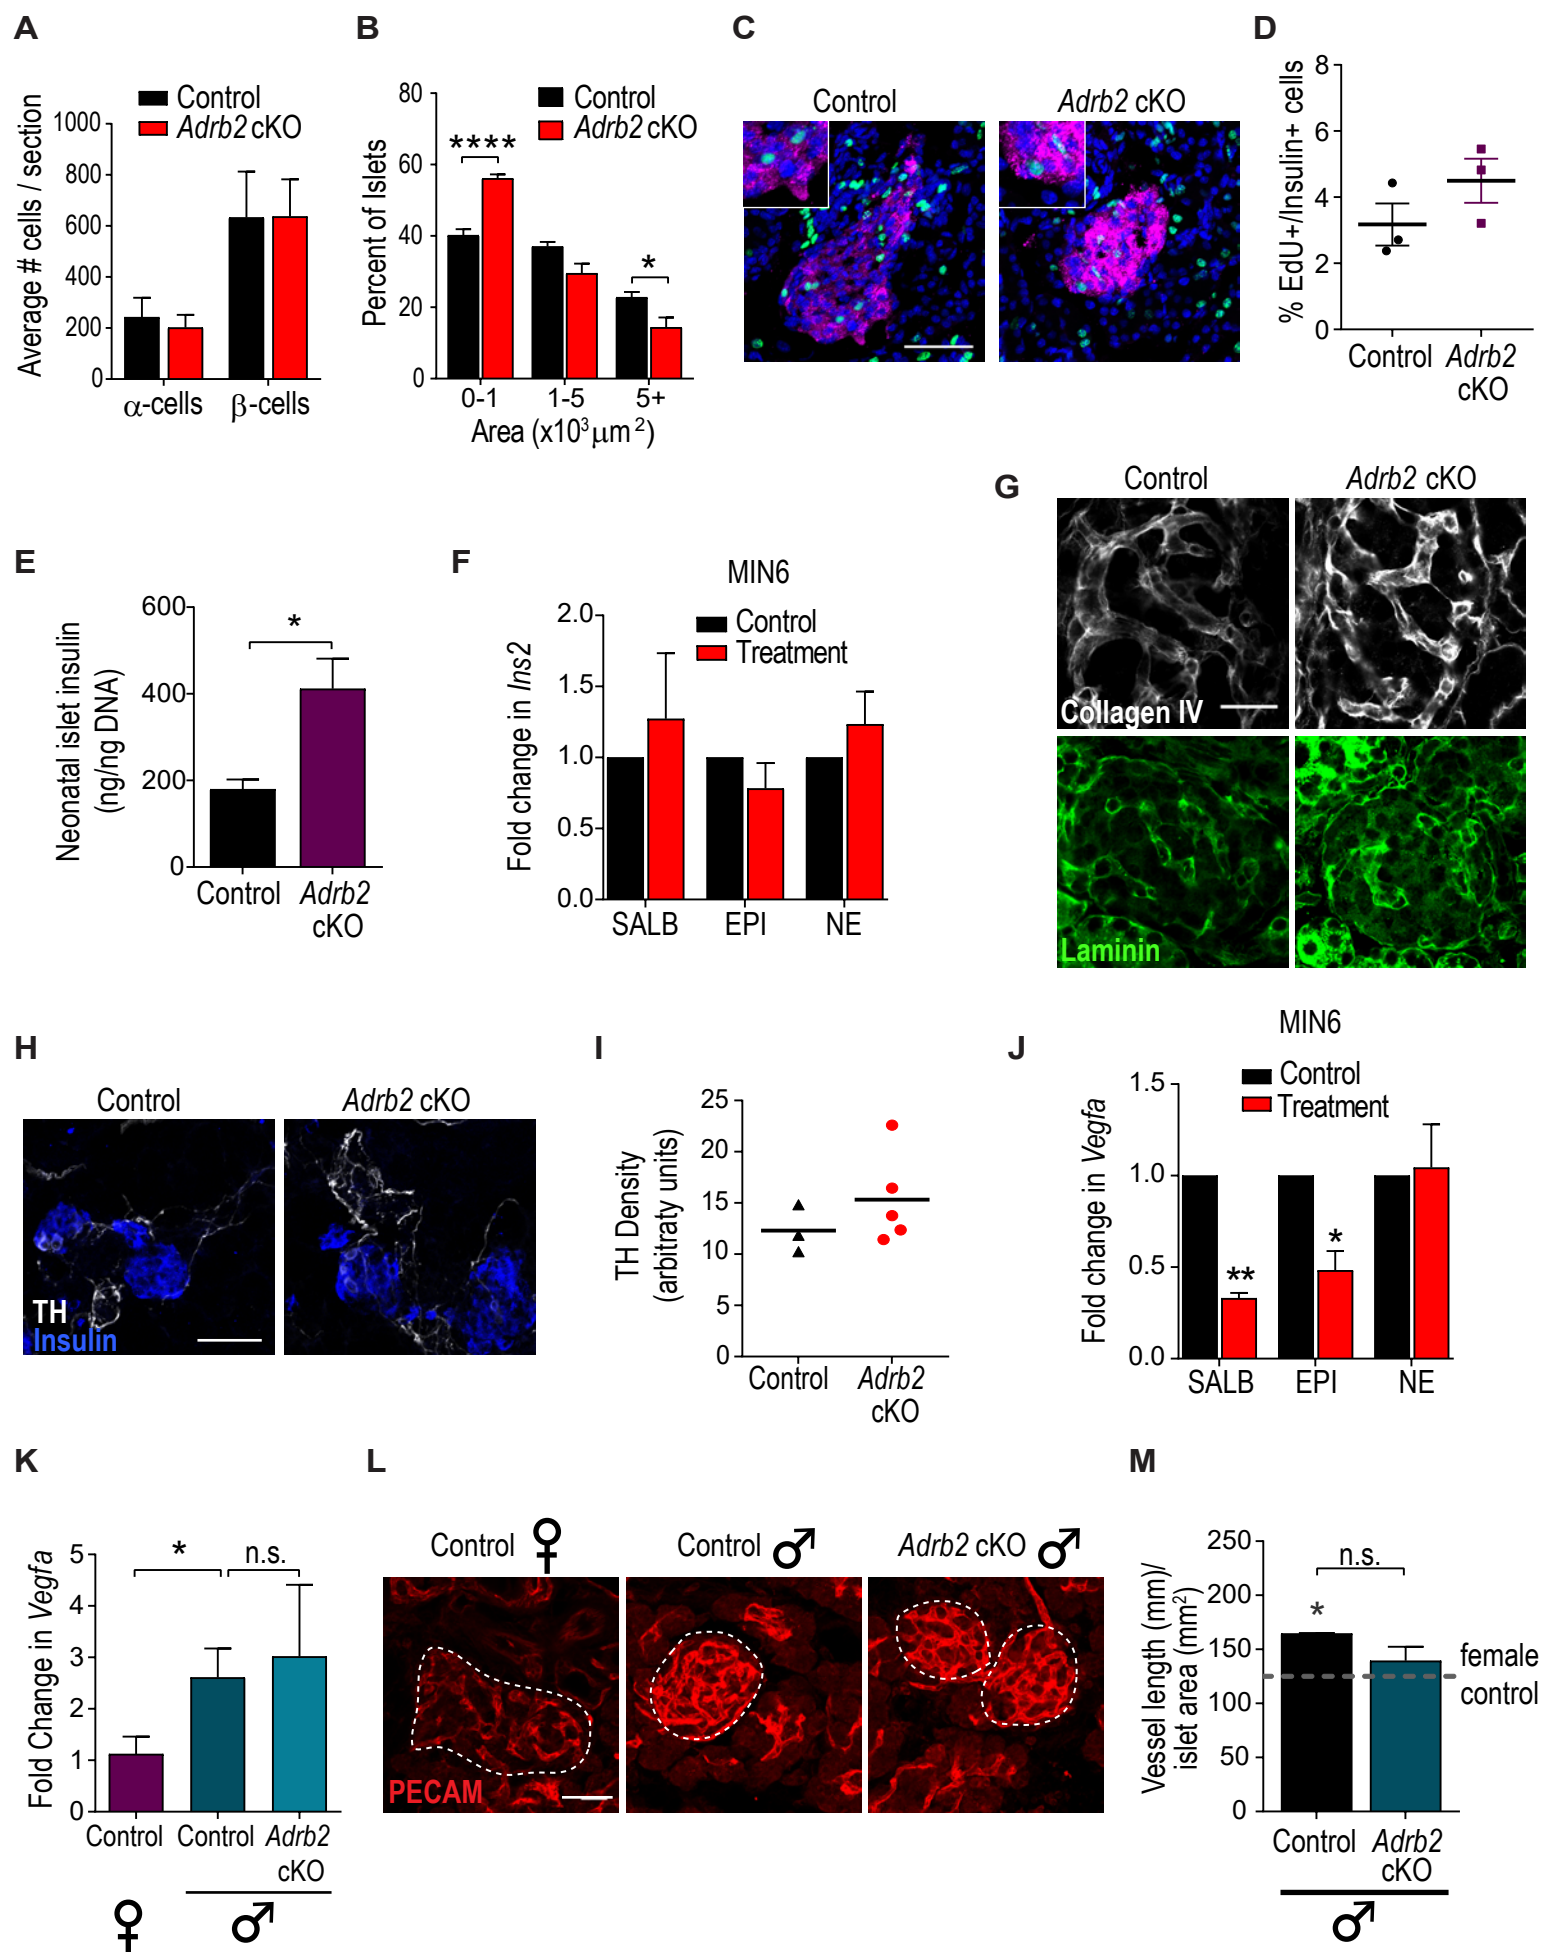

Supplement: supp [file elife-39689-supp-v1.zip]

**A**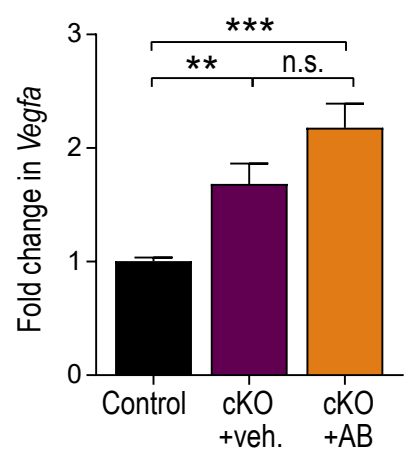**B**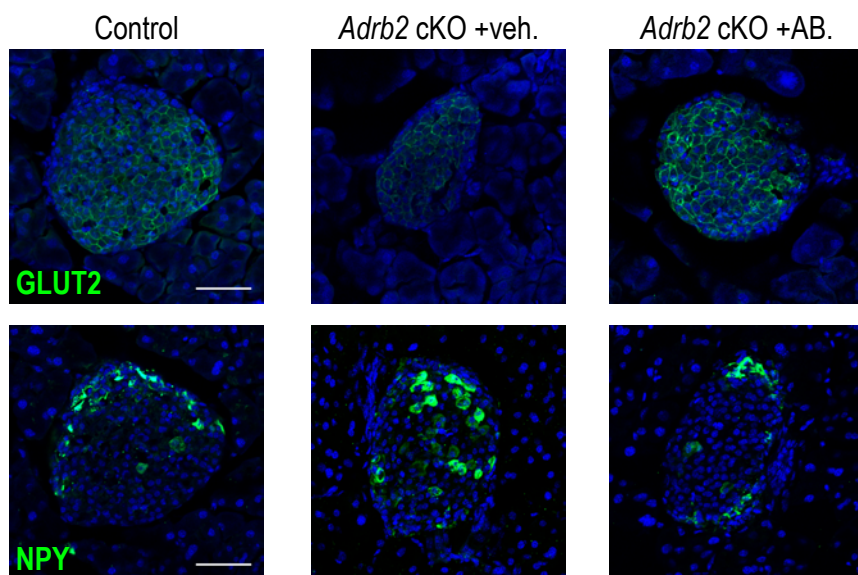

Supplement: supp [file elife-39689-supp-v1.zip]

**A**

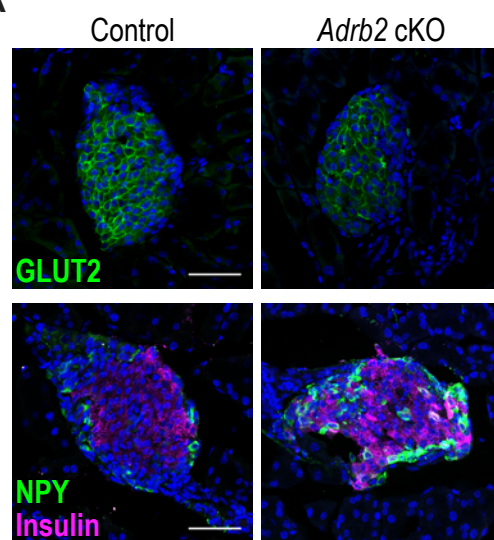

Supplement: supp [file elife-39689-supp-v1.zip]

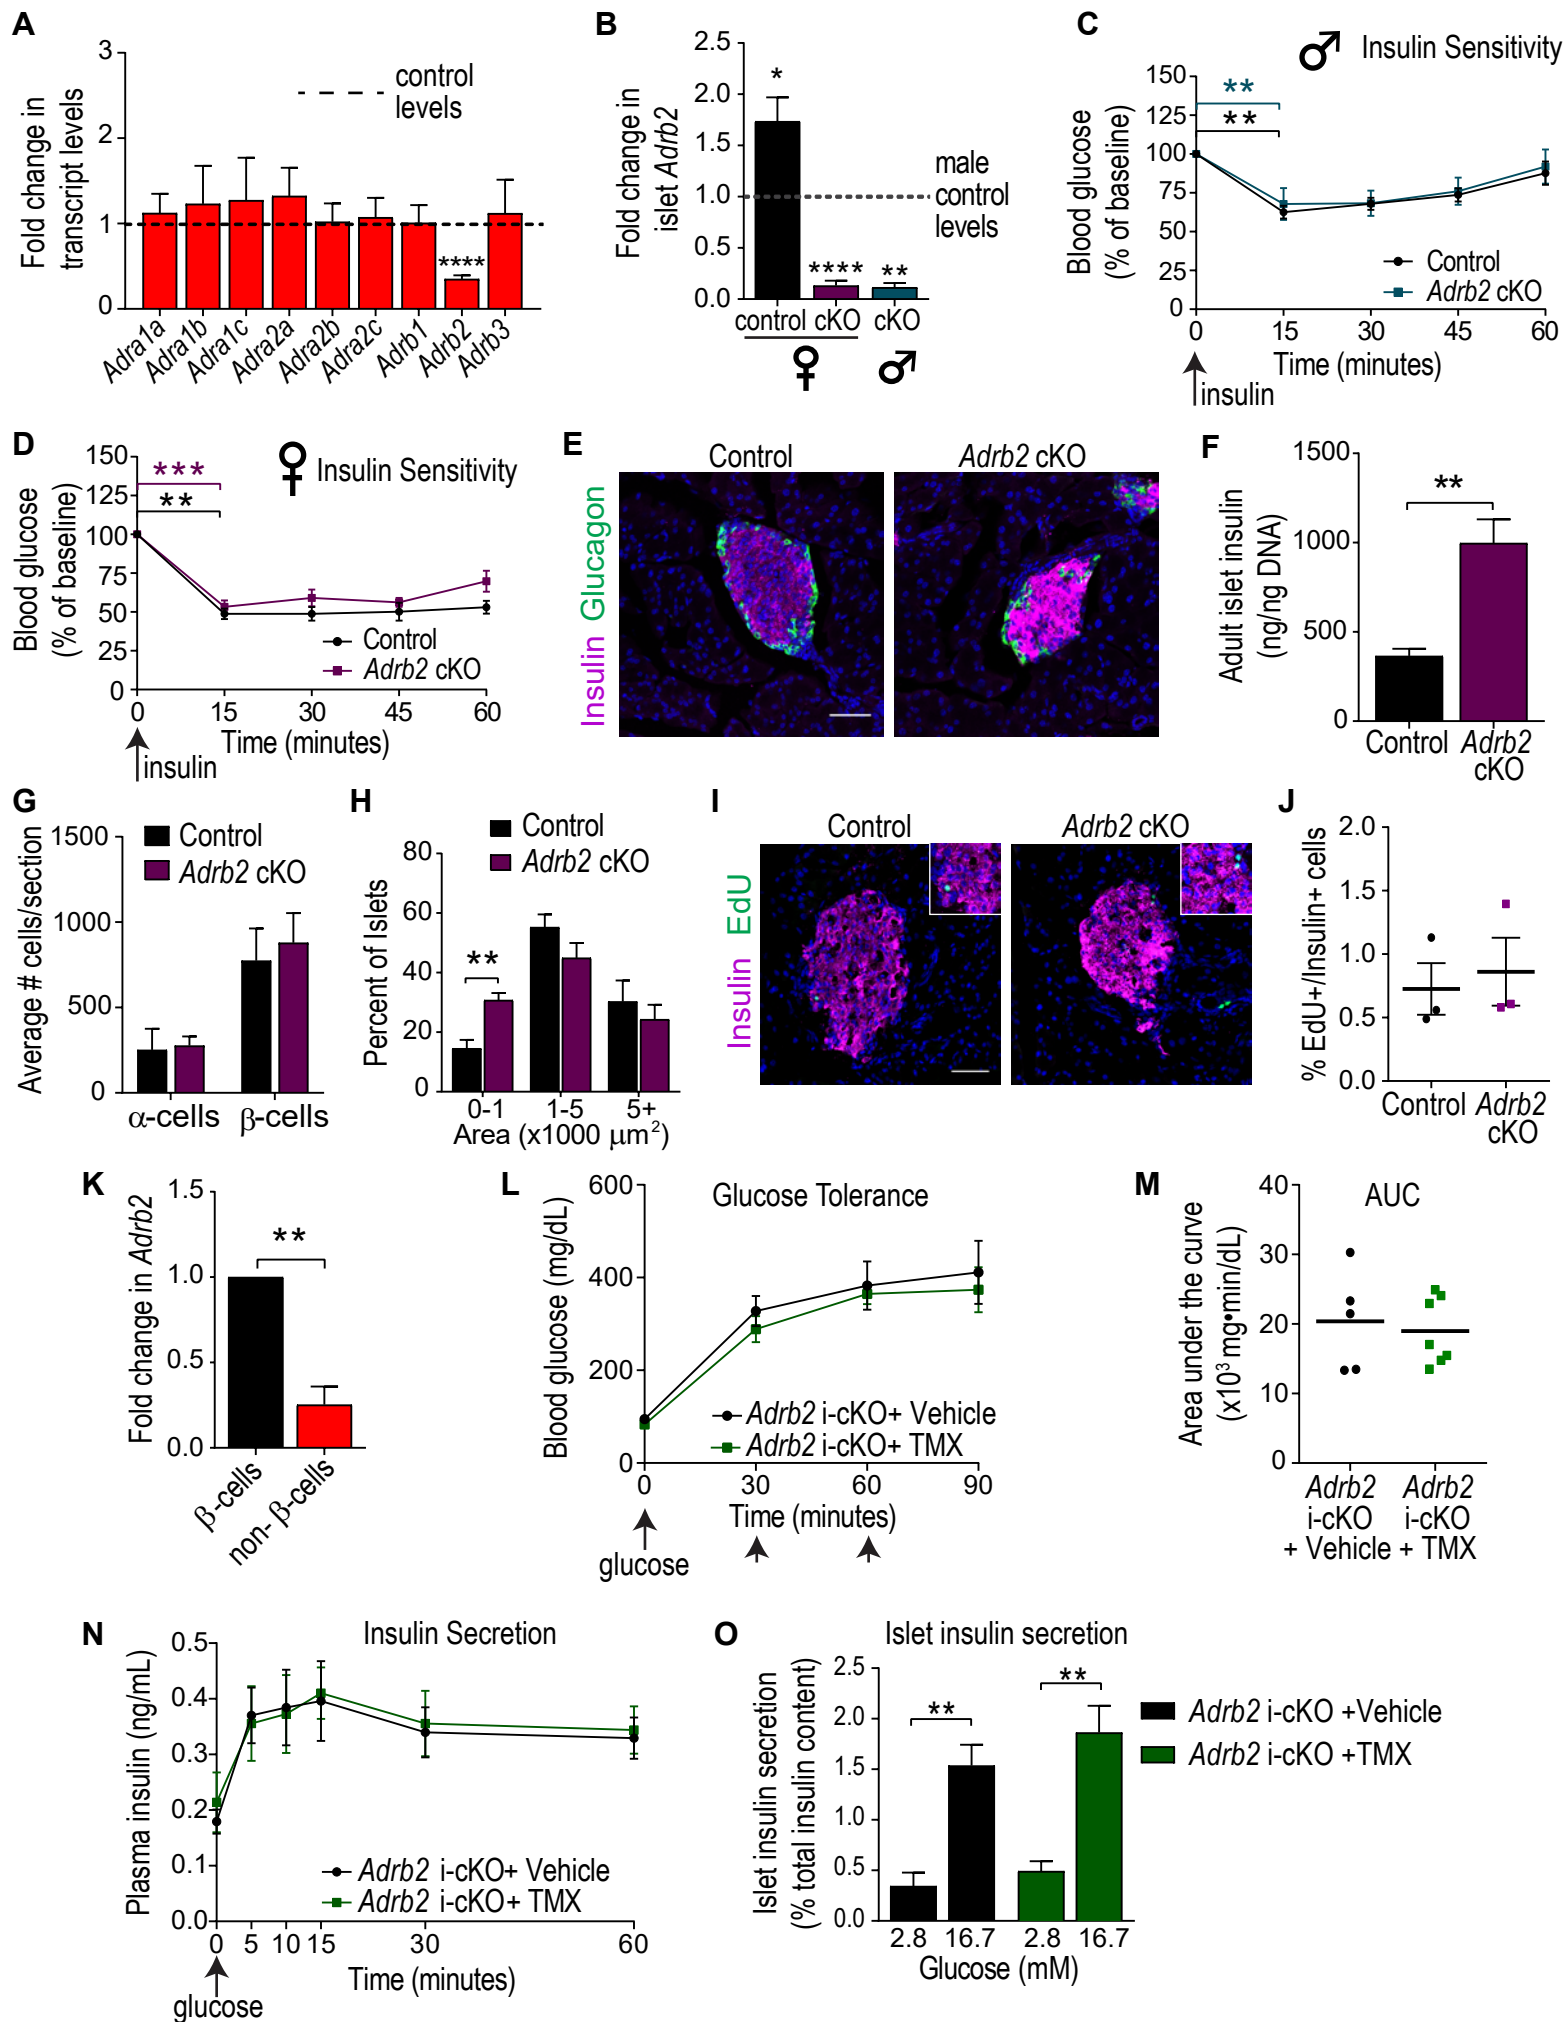

Supplement: supp [file elife-39689-supp-v1.zip]
